# Supplementary material for: Non-invasive Prenatal Diagnosis of Chromosomal Aneuploidies and Microdeletion Syndrome Using Fetal Nucleated Red Blood Cells Isolated by Nanostructure Microchips
Source: PubMed Central journal article supplement — Theranostics. 2018 Feb 2;8(5):1301–11. doi: 10.7150/thno.21979 (PMC5835937; doi:10.7150/thno.21979), 2018-02-02
Supplement: thnov08p1301s1.pdf [file thnov08p1301s1.pdf]

## Supplementary Figure and Table Legends

Supplementary Figure S1. Representative images of RNBCs on the microchip before/after electric stimulation by different voltages (A-F). Image B, D and F represented 0.3 V, 0.5 V and 0.8 V electric stimulation respectively with FDA and PI dyeing.

Supplementary Table S1. Summary of whole-exome sequencing data.

Supplementary Table S2. Number of fNRBCs isolated from maternal peripheral blood at 18 weeks of gestation.

Supplementary Table S3. Number of trisomy fNRBCs isolated from maternal peripheral blood samples with abnormal pregnancy.

**Table S1.** Summary of whole-exome sequencing data

| Sample     | Clean date (Gb) | Initial Bases on target (Mb) | Alignment rate (%) | Base covered on target (Mb) | Fraction of effective target (Mb) | Average sequencing depth | 4×coverage (%) | 10×coverage (%) | 20×coverage (%) |
|------------|-----------------|------------------------------|--------------------|-----------------------------|-----------------------------------|--------------------------|----------------|-----------------|-----------------|
| <b>MBP</b> | 13.49           | 7,610.54                     | 99.07              | 11,150.93                   | 5,112.12                          | 99.18                    | 92.06          | 84.54           | 73.68           |
| <b>Mat</b> | 11.65           | 7,610.54                     | 98.95              | 10,149.06                   | 5,178.39                          | 100.47                   | 96.25          | 94.59           | 91.67           |

**Table S2.** Number of fNRBCs isolated from maternal peripheral blood at 18 week of gestation

| <b>Sample No.</b> | <b>fNRBC number per mL</b> |
|-------------------|----------------------------|
| 1                 | 48                         |
| 2                 | 27                         |
| 3                 | 43                         |
| 4                 | 58                         |
| 5                 | 22                         |
| 6                 | 54                         |
| 7                 | 57                         |
| 8                 | 50                         |
| 9                 | 22                         |
| 10                | 56                         |
| 11                | 37                         |
| 12                | 35                         |
| 13                | 43                         |
| 14                | 32                         |
| 15                | 30                         |

**Table S3.** Number of trisomy fNRBCs isolated from maternal peripheral blood samples with abnormal pregnancy

| <b>Sample No.</b> | <b>Karyotype</b> | <b>fNRBC number per mL</b> |
|-------------------|------------------|----------------------------|
| <b>1</b>          | 47, XN, +21      | 141                        |
| <b>2</b>          | 47, XN, +21      | 177                        |
| <b>3</b>          | 47, XN, +21      | 241                        |
| <b>4</b>          | 47, XN, +21      | 95                         |
| <b>5</b>          | 47, XN, +21      | 39                         |
| <b>6</b>          | 47, XN, +13      | 52                         |
| <b>7</b>          | 47, XN, +13      | 71                         |
| <b>8</b>          | 47, XN, +13      | 76                         |
| <b>9</b>          | 47, XN, +18      | 84                         |
| <b>10</b>         | 47, XN, +18      | 65                         |
| <b>11</b>         | 47, XXY          | 68                         |
| <b>12</b>         | 47, XXY          | 36                         |

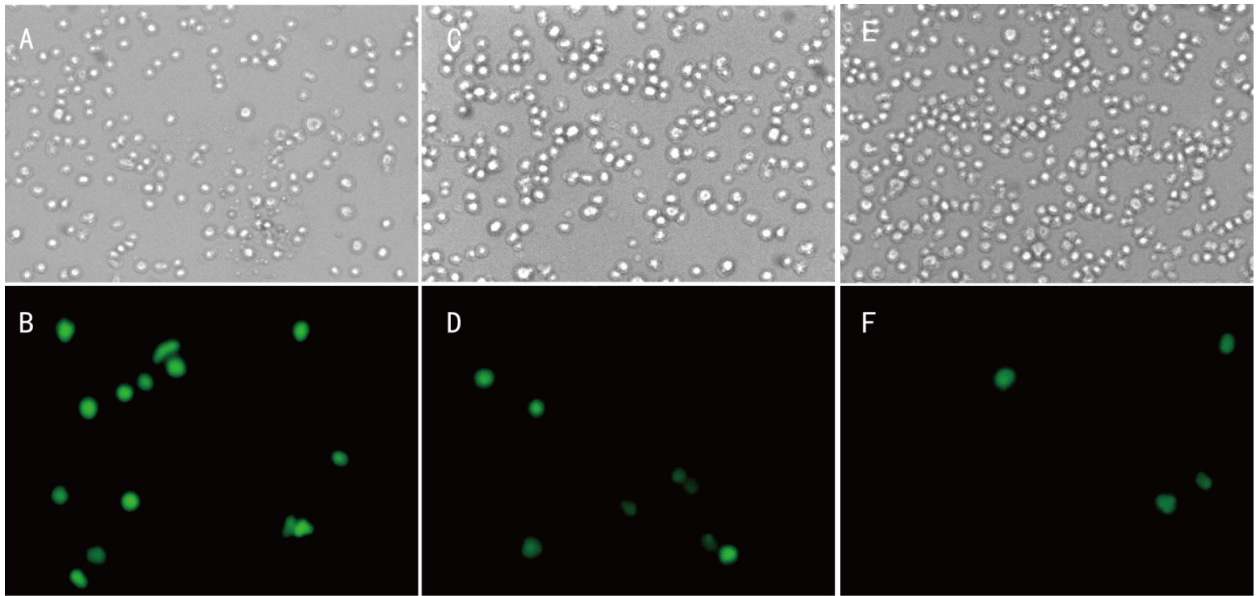

Figure S1. Representative images of RNBCs on the microchip before/after electric stimulation by different voltages (A-F). Image B, D and F represented 0.3 V, 0.5 V and 0.8 V electric stimulation respectively with FDA and PI dyeing.
